# Supplementary material for: PD-L1 promotes GSDMD-mediated NET release by maintaining the transcriptional activity of Stat3 in sepsis-associated encephalopathy
Source: PubMed Central journal article supplement (PMC10086742; doi:10.7150/ijbs.79913), 2023-02-27
Supplement: ijbsv19p1413s1.pdf [file ijbsv19p1413s1.pdf]

1 **Title: PD-L1 promotes GSDMD-mediated NET release by maintaining**  
2 **the transcriptional activity of Stat3 in sepsis-associated**  
3 **encephalopathy**

4  
5 **Author: Cheng-long Zhu<sup>1†</sup>, Jian Xie<sup>1†</sup>, Qiang Liu<sup>1,2†</sup>, Yi Wang<sup>1</sup>, Hui-ru Li<sup>1,3</sup>,**  
6 **Chang-meng Yu<sup>1,2</sup>, Peng Li<sup>1</sup>, Xiao-ming Deng<sup>1,2,3\*</sup>, Jin-jun Bian<sup>1\*</sup>, Jia-feng**  
7 **Wang<sup>1\*</sup>**

8  
9 **Affiliations:**

10 <sup>1</sup> Faculty of Anesthesiology, Changhai Hospital, Naval Medical University, Shanghai,  
11 People's Republic of China

12 <sup>2</sup> Jiangsu Province Key Laboratory of Anesthesiology, Xuzhou Medical University,  
13 Xuzhou, Jiangsu Province, People's Republic of China

14 <sup>3</sup> Faculty of Anesthesiology, Weifang Medical University, Weifang, Shandong Province,  
15 People's Republic of China

16  
17 **\*Corresponding Authors:** Jia-feng Wang, M.D., Ph.D., Faculty of Anesthesiology,  
18 Changhai Hospital, the Naval Medical University, 168 Changhai Road, Yangpu District,  
19 Shanghai 200433, People's Republic of China. Email: [jfwang@smmu.edu.cn](mailto:jfwang@smmu.edu.cn). Jin-jun  
20 Bian, M.D., Ph.D., Faculty of Anesthesiology, Changhai Hospital, the Naval Medical  
21 University, 168 Changhai Road, Yangpu District, Shanghai 200433, People's Republic  
22 of China. Email: [jinjuncu@163.com](mailto:jinjuncu@163.com). Xiao-ming Deng, M.D., Ph.D., Faculty of  
23 Anesthesiology, Changhai Hospital, the Naval Medical University, 168 Changhai Road,

24 Yangpu District, Shanghai 200433, People's Republic of China. Email:

25 [dengphd@smmu.edu.cn](mailto:dengphd@smmu.edu.cn).

26

27

28

29

30

31

32

33

34

35

36

37

38

39

40

41

42

43

44

45

46

47

48

49

50

51

52

53

54

55

56

57

58

59

60

61

62

63

64

65

66 **Table S1**

67 The primers for PCR or RT-PCR in this study.

|        |                                                 |
|--------|-------------------------------------------------|
| PCR    | GSDMD-Forward: 5'-CTCGCCGACTTCCGTAAACT-3'       |
|        | GSDMD-Reverse: 5'-CTTGACCTTGCTATCCACCC-3'       |
| RT-PCR | GSDMD-Forward: 5'-GTGTGTCAACCTGTCTATCAAGG-3'    |
|        | GSDMD-Reverse: 5'-CATGGCATCGTAGAAGTGGAAAG-3'    |
| RT-PCR | $\beta$ -actin-Forward: 5'-GCACAGAGCCTCGCCTT-3' |
|        | $\beta$ -actin-Reverse: 5'-GTTGTCGACGACGAGCG-3' |

68

69 **Table S2**

70 JASPAR analysis results for Stat3 binding sites located within the promoter of human

71 GSDMD gene.

| Relative Score | Start | End | Strand | Predicted Sequence |
|----------------|-------|-----|--------|--------------------|
| 0.982          | 552   | 562 | -      | TTTCCGGGAAG        |
| 0.957          | 694   | 704 | +      | TTTCCAGGAAT        |
| 0.955          | 694   | 704 | -      | ATTCCTGGAAA        |

72

73

74

75

76

77
